# Supplementary material for: Comparative Effectiveness of Bivalent (Original/Omicron BA.4/BA.5) COVID-19 Vaccines in Adults
Source: MDPI journal article supplement (doi:10.3390/vaccines11111711), 2023-11-11
Supplement: s1 [file s1]

## Supplementary Materials

### Supplementary Methods

#### Data set and deidentification

Past research successfully used this integrated dataset to evaluate vaccine effectiveness and its data to contain key variables for conducting effectiveness /outcomes research and demonstrated it to be representative of the US population [1–3]. Each data asset meets the minimum protected health information (PHI) data requirements as specified for use by the algorithm. Research staff were not involved in the preparation of datasets containing PHI or the actual running of the algorithm. The final linked data set merged the patient-level deidentified tokens in each individual dataset and contained no PHI. This linked, deidentified dataset was compliant with the Health Insurance Portability and Accountability Act (HIPAA) and certified for research use. Approval by an institutional review board and patient consent were not necessary as the study was a noninterventive, retrospective cohort using a certified HIPAA-compliant deidentified research database.

#### Statistical analysis

We considered the cohort to be well-balanced if the difference in SMD between the comparison groups was  $<0.1$ .

To explore the possibility of residual confounding, we used a negative control. We evaluated the risk of COVID-19-related hospitalization within the first 7 days after vaccination and compared the cumulative incidence among the exposure groups during this immunization lag period. This approach allowed us to ensure that both groups were comparable before the cohort entry date (CED).

To control inflation of the type 1 error rate due to multiple testing (family wise error rate), we used a step-down testing procedure for secondary endpoints and the age subgroup analysis by adjusting the rejection criteria for each of the individually tested hypotheses [4]. We did statistical testing at a significance level of  $p=0.05$  and stopped when a secondary endpoint did not reach statistical significance.

#### Open and closed claims datasets

In this study, we have used closed claims in the main analysis and open claims in the sensitivity analysis. A three-tiered definition of closed claims was used to generate a closed claims dataset. First, a claim was closed for a patient if all medical and pharmacy transactions were received in a given time period. If not all transactions for a patient had been received, the data was considered “open” for that patient. Second, a source was “closed/payer complete” if all patient claims were “closed” under that payer. Third, time periods in which patients were closed could be determined by the enrollment dates; hence enrollment periods were considered closed if the end date of enrollment was closed for that patient. Medical and pharmacy claims included in a closed claims dataset were all post-adjudication claims. Therefore, the closed claims dataset that was used in the main analysis captured all claims associated with a patient (medical and pharmacy) during the time period in which they were enrolled. The open claims analysis used all claims available for a given patient, regardless of whether they were during an enrollment period, sourced from a payer, or considered closed. For

patients with open claims, follow-up was concluded at the end of data availability. The analysis utilized the last evidence of database activity (EHR or claims) as the endpoint for follow-up.

### **Identification of COVID-19-related medical encounters**

We identified inpatient admissions based on all claims billed in the inpatient setting. Among these claims, we assigned those associated with inpatient hospital services to the inpatient hospital designation, and those associated with non-inpatient services (such as skilled nursing facilities or emergency department visits) to the outpatient designation. Once encounters were identified as either inpatient or outpatient, we flagged claims with a diagnosis code for COVID-19 (in any position). We identified additional outpatient cases in the EHR via diagnosis codes (see **Table S2**) and included telehealth consultations and emergency visits.

**Table S1. List of CVX, CPT, and NDC codes used to identify bivalent (Original/Omicron BA.4/BA.5) COVID-19 vaccines from the Veradigm EHR and linked claims datasets.**

| Code Type | Code          | Description                                                                                                                                                                                                                                                                                                                                                   | Vaccine           | Dose Sequence    |
|-----------|---------------|---------------------------------------------------------------------------------------------------------------------------------------------------------------------------------------------------------------------------------------------------------------------------------------------------------------------------------------------------------------|-------------------|------------------|
| CPT       | 91313         | Severe acute respiratory syndrome coronavirus 2 (SARS-CoV-2) (coronavirus disease [COVID-19]) vaccine, mRNA-LNP, spike protein, bivalent, preservative free, 50 mcg/0.5 mL dosage, for intramuscular use                                                                                                                                                      | mRNA-1273.222     | Bivalent booster |
| CPT       | 0134A         | Immunization administration by intramuscular injection of severe acute respiratory syndrome coronavirus 2 (SARS-CoV-2) (coronavirus disease [COVID-19]) vaccine, mRNA-LNP, spike protein, bivalent, preservative free, 50 mcg/0.5 mL dosage, booster dose                                                                                                     | mRNA-1273.222     | Bivalent booster |
| NDC       | 80777-0280-05 | mRNA-1273 COVID-19 vaccine, BL (80777-280-05)                                                                                                                                                                                                                                                                                                                 | mRNA-1273.222     | Bivalent booster |
| NDC       | 80777-0280-99 | mRNA-1273 COVID-19 vaccine, Bivalent; 0.1 mg/mL; 10 VIAL in 1 CARTON, 2.5 mL in 1 VIAL                                                                                                                                                                                                                                                                        | mRNA-1273.222     | Bivalent booster |
| CVX       | 229           | SARS-COV-2 (COVID-19) vaccine, mRNA, spike protein, LNP, bivalent, preservative free, 50 mcg/0.5 mL dose [Pre-EUA mRNA-1273 bivalent adult booster original strain + omicron strain]                                                                                                                                                                          | mRNA-1273.222     | Bivalent booster |
| CVX       | 300           | SARS-COV-2 (COVID-19) vaccine, mRNA, spike protein, LNP, bivalent booster, preservative free, 30 mcg/0.3 mL dose, tris-sucrose formulation; EUA authorized BNT162b2 adult bivalent booster ages 12+ yrs, original strain + omicron BA.4/BA.5. Not authorized by WHO. Non-US tradename for same formulation (Comirnaty Bivalent) counted toward immunity in US | BNT162b2 Bivalent | Bivalent booster |
| CPT       | 91312         | Severe acute respiratory syndrome coronavirus 2 (SARS-CoV-2) (coronavirus disease [COVID-19]) vaccine, mRNA-LNP, bivalent spike protein, preservative free, 30 mcg/0.3 mL dosage, tris-sucrose formulation, for intramuscular use                                                                                                                             | BNT162b2 Bivalent | Bivalent booster |

| Code Type | Code          | Description                                                                                                                                                                                                                                                                        | Vaccine              | Dose Sequence       |
|-----------|---------------|------------------------------------------------------------------------------------------------------------------------------------------------------------------------------------------------------------------------------------------------------------------------------------|----------------------|---------------------|
| CPT       | 0124A         | Immunization administration by intramuscular injection of severe acute respiratory syndrome coronavirus 2 (SARS-CoV-2) (coronavirus disease [COVID-19]) vaccine, mRNA-LNP, bivalent spike protein, preservative free, 30 mcg/0.3 mL dosage, tris-sucrose formulation, booster dose | BNT162b2<br>Bivalent | Bivalent<br>booster |
| NDC       | 59267-0304-01 | PFIZER COVID BIVALENT BOOST(12Y UP)(ORIG-BA.4/5)(GRAY)(EUA)                                                                                                                                                                                                                        | BNT162b2<br>Bivalent | Bivalent<br>booster |
| NDC       | 59267-0304-02 | PFIZER COVID BIVALENT BOOST(12Y UP)(ORIG-BA.4/5)(GRAY)(EUA)                                                                                                                                                                                                                        | BNT162b2<br>Bivalent | Bivalent<br>booster |
| NDC       | 59267-1404-01 | PFIZER COVID BIVALENT BOOST(12Y UP)(ORIG-BA.4/5)(GRAY)(EUA)                                                                                                                                                                                                                        | BNT162b2<br>Bivalent | Bivalent<br>booster |
| NDC       | 59267-1404-02 | PFIZER COVID BIVALENT BOOST(12Y UP)(ORIG-BA.4/5)(GRAY)(EUA)                                                                                                                                                                                                                        | BNT162b2<br>Bivalent | Bivalent<br>booster |

CPT, current procedural terminology; NDC, national drug codes; CVX, vaccine administered code set.

**Table S2. ICD-10 and SNOMED codes for the outcome of COVID-19-related medical encounters identified from individuals' primary care EHRs, pharmacy, and medical claims.**

| Code type | Codes for COVID-related medical encounters                                                                                                                                                                                                                                                                                                         |
|-----------|----------------------------------------------------------------------------------------------------------------------------------------------------------------------------------------------------------------------------------------------------------------------------------------------------------------------------------------------------|
| ICD-10-CM | J1282, U071, U072, B34.2                                                                                                                                                                                                                                                                                                                           |
| SNOMED    | 1119302008, 119731000146105, 119741000146102, 119751000146104, 119981000146107, 1240411000000107, 1240521000000100, 1240531000000103, 1240541000000107, 1240561000000108, 1240581000000104, 674814021000119106, 840533007, 840534001, 840536004, 840539006, 866151004, 866152006, 870577009, 870588003, 870589006, 870590002, 870591003, 871562009 |

EHR, electronic health records; ICD, international classification of diseases; SNOMED, systematized nomenclature of medicine clinical terms.

**Table S3. List of potential confounding baseline variables which were weighted using propensity weighting scoring prior to data analysis,**

| Variable                                                                                            | Variable Type | Categories                                                                                                                                                                                                                                                                                                                                                                                                                                                                                                                                                                                                                                                                                                                                                                       |
|-----------------------------------------------------------------------------------------------------|---------------|----------------------------------------------------------------------------------------------------------------------------------------------------------------------------------------------------------------------------------------------------------------------------------------------------------------------------------------------------------------------------------------------------------------------------------------------------------------------------------------------------------------------------------------------------------------------------------------------------------------------------------------------------------------------------------------------------------------------------------------------------------------------------------|
| <b>Age<sup>a</sup></b>                                                                              | Categorical   | 5-year range from 25 years onwards (i.e., 18–24, 25–29, 30–34, 35–39, etc.)                                                                                                                                                                                                                                                                                                                                                                                                                                                                                                                                                                                                                                                                                                      |
| <b>Sex</b>                                                                                          | Categorical   | Female, Male                                                                                                                                                                                                                                                                                                                                                                                                                                                                                                                                                                                                                                                                                                                                                                     |
| <b>Race</b>                                                                                         | Categorical   | <ul style="list-style-type: none"> <li>• Black or African American</li> <li>• White</li> <li>• Other</li> <li>• Not Reported</li> </ul>                                                                                                                                                                                                                                                                                                                                                                                                                                                                                                                                                                                                                                          |
| <b>Ethnicity</b>                                                                                    | Categorical   | <ul style="list-style-type: none"> <li>• Hispanic</li> <li>• Non-Hispanic</li> <li>• Not Reported</li> </ul>                                                                                                                                                                                                                                                                                                                                                                                                                                                                                                                                                                                                                                                                     |
| <b>Insurance Type</b>                                                                               | Categorical   | <ul style="list-style-type: none"> <li>• Commercial</li> <li>• Medicaid</li> <li>• Medicare Advanced</li> <li>• Medicare FFS</li> <li>• Other</li> <li>• Unknown</li> </ul>                                                                                                                                                                                                                                                                                                                                                                                                                                                                                                                                                                                                      |
| <b>Geographic region<sup>b</sup></b>                                                                | Categorical   | <ul style="list-style-type: none"> <li>• <b>Northeast</b> (Connecticut, Maine, Massachusetts, New Hampshire, New Jersey, New York, Pennsylvania, Rhode Island, Vermont)</li> <li>• <b>Midwest</b> (Illinois, Indiana, Iowa, Michigan, Minnesota, Missouri, Nebraska, North Dakota, Ohio, Kansas, South Dakota, Wisconsin)</li> <li>• <b>South</b> (Alabama, Arkansas, Delaware, District of Columbia, Florida, Georgia, Kentucky, Louisiana, Maryland, Mississippi, North Carolina, Oklahoma, South Carolina, Tennessee, Texas, Virginia, West Virginia)</li> <li>• <b>West</b> (Alaska, Arizona, California, Colorado, Hawaii, Idaho, Montana, Nevada, New Mexico, Oregon, Utah, Washington, Wyoming)</li> <li>• <b>Other</b></li> <li>• <b>Not Reported/missing</b></li> </ul> |
| <b>Underlying medical conditions (with increased risk for severe COVID-19 outcomes<sup>c</sup>)</b> | Categorical   | <ul style="list-style-type: none"> <li>• Asthma</li> <li>• Cancer</li> <li>• Cerebrovascular disease</li> <li>• Chronic kidney disease</li> <li>• Chronic lung diseases</li> <li>• Chronic liver disease</li> <li>• Cystic fibrosis</li> <li>• Diabetes mellitus, types 1 and 2</li> <li>• Disabilities, including Down syndrome</li> <li>• Heart conditions</li> <li>• HIV</li> <li>• Mental health conditions</li> <li>• Neurological conditions</li> <li>• Obesity (BMI &gt;30 kg/m<sup>2</sup>)</li> </ul>                                                                                                                                                                                                                                                                   |

|                                                                           |             |                                                                                                                                                                                                                                                                                                                                                           |
|---------------------------------------------------------------------------|-------------|-----------------------------------------------------------------------------------------------------------------------------------------------------------------------------------------------------------------------------------------------------------------------------------------------------------------------------------------------------------|
|                                                                           |             | <ul style="list-style-type: none"> <li>• Physical inactivity</li> <li>• Pregnancy and recent pregnancy</li> <li>• Primary immunodeficiencies</li> <li>• Smoking, current and former</li> <li>• Solid organ or blood stem cell transplantation</li> <li>• Tuberculosis</li> <li>• Use of corticosteroids or other immunosuppressive medications</li> </ul> |
| <b>Number of outpatient visits in year prior to index date</b>            | Continuous  | –                                                                                                                                                                                                                                                                                                                                                         |
| <b>Number of all-cause hospital admission in year prior to index data</b> | Continuous  | –                                                                                                                                                                                                                                                                                                                                                         |
| <b>Data source of recorded vaccination<sup>d</sup></b>                    | Categorical | <ul style="list-style-type: none"> <li>• Inpatient claim</li> <li>• Outpatient claim</li> <li>• Outpatient EHR data</li> <li>• Pharmacy claim</li> </ul>                                                                                                                                                                                                  |
| <b>Primary series vaccination</b>                                         | Categorical | <ul style="list-style-type: none"> <li>• Homologous = same brand as bivalent dose</li> <li>• Heterologous = different brand from bivalent dose</li> <li>• Not documented</li> </ul>                                                                                                                                                                       |
| <b>Time since last COVID-19 monovalent vaccination</b>                    | Categorical | <ul style="list-style-type: none"> <li>• Less than 3 months</li> <li>• 3 to 6 months</li> <li>• 6 months or more</li> <li>• Not documented</li> </ul>                                                                                                                                                                                                     |
| <b>Time since last COVID-19 infection</b>                                 | Categorical | <ul style="list-style-type: none"> <li>• Less than 4 months</li> <li>• 4 to 6 months</li> <li>• 6 months or more</li> <li>• Not documented</li> </ul>                                                                                                                                                                                                     |
| <b>Month of index date</b>                                                | Categorical | Calendar month of index date                                                                                                                                                                                                                                                                                                                              |

BMI, body mass index; CDC, Centers for Disease Control and Prevention; EHR, electronic health records; FFS, fee for service.

<sup>a</sup>Participant age was capped at ≤89 years to prevent possible patient re-identification. <sup>b</sup>Categorized into one of five mutually exclusive geographic locations in the U.S. based on regional census divisions ([https://www2.census.gov/geo/pdfs/maps-data/maps/reference/us\\_regdiv.pdf](https://www2.census.gov/geo/pdfs/maps-data/maps/reference/us_regdiv.pdf)). <sup>c</sup>As per CDC guidelines: <https://www.cdc.gov/coronavirus/2019-ncov/hcp/clinical-care/underlyingconditions.html#print>. <sup>d</sup>Counts of patients by recorded vaccination source for each vaccine type are reported. These counts were mutually exclusive and decided in a hierarchical manner.

**Table S4. Baseline characteristics (post-weighting) of individuals ≥50 years vaccinated with the mRNA-1273.222 or BNT162b2 Bivalent vaccine.**

|                                                        |                         | <b>mRNA-1273.222</b> | <b>BNT162b2 Bivalent</b> | <b>SMD</b> |
|--------------------------------------------------------|-------------------------|----------------------|--------------------------|------------|
| <b>Number of patients</b>                              |                         | 773,586              | 1,178,604                |            |
| <b>Age at index, mean (SD)</b>                         |                         | 67 (9.8)             | 67 (9.8)                 | 0.0096     |
| <b>Sex</b>                                             | Female                  | 441,890 (57.1)       | 674,578 (57.2)           | 0.0023     |
|                                                        | Male                    | 331,696 (42.9)       | 504,026 (42.8)           |            |
| <b>Race</b>                                            | Black                   | 34,192 (4.4)         | 53,214 (4.5)             | 0.0048     |
|                                                        | Other                   | 28,091 (3.6)         | 42,554 (3.6)             |            |
|                                                        | White                   | 330,585 (42.7)       | 502,282 (42.6)           |            |
|                                                        | Unknown                 | 380,720 (49.2)       | 580,554 (49.3)           |            |
| <b>Ethnicity</b>                                       | Hispanic                | 27,889 (3.6)         | 43,003 (3.6)             | 0.0037     |
|                                                        | Non-Hispanic            | 628,014 (81.2)       | 955,114 (81.0)           |            |
|                                                        | Unknown                 | 117,684 (15.2)       | 180,488 (15.3)           |            |
| <b>Geographic region</b>                               | Midwest                 | 154,244 (19.9)       | 246,754 (20.9)           | 0.0257     |
|                                                        | Northeast               | 210,073 (27.2)       | 318,540 (27.0)           |            |
|                                                        | South                   | 228,525 (29.5)       | 340,656 (28.9)           |            |
|                                                        | West                    | 133,783 (17.3)       | 202,010 (17.1)           |            |
|                                                        | Unknown                 | 46,961 (6.1)         | 70,645 (6.0)             |            |
| <b>Month of index date</b>                             | 08-2022                 | 7 (<0.1)             | 10 (<0.1)                | 0.0281     |
|                                                        | 09-2022                 | 193,716 (25.0)       | 309,209 (26.2)           |            |
|                                                        | 10-2022                 | 293,896 (38.0)       | 443,231 (37.6)           |            |
|                                                        | 11-2022                 | 159,921 (20.7)       | 237,589 (20.2)           |            |
|                                                        | 12-2022                 | 88,664 (11.5)        | 132,321 (11.2)           |            |
|                                                        | 1-2023                  | 29,837 (3.9)         | 44,812 (3.8)             |            |
|                                                        | 2-2023                  | 7,545 (1.0)          | 11,433 (1.0)             |            |
| <b>Primary series COVID-19 vaccine</b>                 | Heterologous            | 65,270 (8.4)         | 108,088 (9.2)            | 0.0410     |
|                                                        | Homologous              | 184,827 (23.9)       | 263,818 (22.4)           |            |
|                                                        | Not reported            | 523,490 (67.7)       | 806,699 (68.4)           |            |
| <b>Time since last COVID-19 monovalent vaccination</b> | ≤90 days                | 11,598 (1.5)         | 17,290 (1.5)             | 0.0400     |
|                                                        | 91–180 days             | 159,810 (20.7)       | 224,925 (19.1)           |            |
|                                                        | >180 days               | 418,407 (54.1)       | 649,236 (55.1)           |            |
|                                                        | Not reported            | 183,772 (23.8)       | 287,154 (24.4)           |            |
| <b>Time since last COVID-19 infection</b>              | ≤120 days               | 26,820 (3.5)         | 41,276 (3.5)             | 0.0084     |
|                                                        | 121–180 days            | 14,095 (1.8)         | 21,416 (1.8)             |            |
|                                                        | >180 days               | 55,039 (7.1)         | 86,306 (7.3)             |            |
|                                                        | Not reported            | 677,633 (87.6)       | 10,29,606 (87.4)         |            |
| <b>Underlying medical conditions</b>                   | Asthma                  | 66,720 (8.6)         | 102,181 (8.7)            | 0.0016     |
|                                                        | Cancer                  | 276,033 (35.7)       | 418,297 (35.5)           | 0.0040     |
|                                                        | Cerebrovascular disease | 54,803 (7.1)         | 84,117 (7.1)             | 0.0021     |
|                                                        | Chronic lung disease    | 77,622 (10.0)        | 118,678 (10.1)           | 0.0012     |
|                                                        | Chronic liver disease   | 10,348 (1.3)         | 15,948 (1.4)             | 0.0013     |



|  |                                                   |                |                |        |
|--|---------------------------------------------------|----------------|----------------|--------|
|  | CKD                                               | 85,312 (11)    | 130,593 (11.1) | 0.0017 |
|  | Cystic fibrosis                                   | 100 (<0.1)     | 141 (<0.1)     | 0.0008 |
|  | Diabetes type 1 or 2                              | 189,989 (24.6) | 290,136 (24.6) | 0.0013 |
|  | Disability                                        | 38,177 (4.9)   | 58,560 (5.0)   | 0.0015 |
|  | Heart conditions                                  | 137,395 (17.8) | 209,653 (17.8) | 0.0007 |
|  | HIV                                               | 4,145 (0.5)    | 6,349 (0.5)    | 0.0004 |
|  | Mental health disorders                           | 116,509 (15.1) | 181,524 (15.4) | 0.0095 |
|  | Neurological conditions                           | 22,418 (2.9)   | 36,092 (3.1)   | 0.0097 |
|  | Obesity                                           | 167,583 (21.7) | 257,071 (21.8) | 0.0036 |
|  | Primary immunodeficiencies                        | 57,071 (7.4)   | 86,869 (7.4)   | 0.0003 |
|  | Pregnancy <sup>a</sup>                            | 15 (<0.1)      | 23 (<0.1)      | 0.0001 |
|  | Physical inactivity                               | 786 (0.1)      | 1,215 (0.1)    | 0.0005 |
|  | Smoking <sup>b</sup>                              | 109,796 (14.2) | 168,895 (14.3) | 0.0039 |
|  | Solid organ or hematopoietic stem cell transplant | 8,011 (1.0)    | 12,374 (1.0)   | 0.0014 |
|  | Tuberculosis                                      | 259 (<0.1)     | 395 (<0.1)     | 0.000  |
|  | Use of immunosuppressants                         | 45,087 (5.8)   | 68,657 (5.8)   | 0.0001 |

Data are presented as n (%) unless otherwise stated. CKD, chronic kidney disease; SD, standard deviation; SMD, standardized mean difference. <sup>a</sup>Includes recent pregnancy. <sup>b</sup>Includes current and former smokers.

**Table S5. Baseline characteristics (post-weighting) of individuals ≥65 years vaccinated with the mRNA-1273.222 or BNT162b2 Bivalent vaccine.**

|                                                        |              | <b>mRNA-1273.222</b> | <b>BNT162b2 Bivalent</b> | <b>SMD</b> |
|--------------------------------------------------------|--------------|----------------------|--------------------------|------------|
| <b>Number of patients</b>                              |              | 445,994              | 641,195                  |            |
| <b>Age at index, mean (SD)</b>                         |              | 74 (6.6)             | 74 (6.7)                 | 0.0023     |
| <b>Sex</b>                                             | Female       | 253,468 (56.8)       | 365,297 (57.0)           | 0.0028     |
|                                                        | Male         | 192,525 (43.2)       | 275,898 (43.0)           |            |
| <b>Race</b>                                            | Black        | 19,132 (4.3)         | 27,806 (4.3)             | 0.0030     |
|                                                        | Other        | 13,813 (3.1)         | 19,675 (3.1)             |            |
|                                                        | White        | 204,836 (45.9)       | 294,383 (45.9)           |            |
|                                                        | Unknown      | 208,213 (46.7)       | 299,331 (46.7)           |            |
| <b>Ethnicity</b>                                       | Hispanic     | 14,184 (3.2)         | 20,630 (3.2)             | 0.0031     |
|                                                        | Non-Hispanic | 365,189 (81.9)       | 524,332 (81.8)           |            |
|                                                        | Unknown      | 66,621 (14.9)        | 96,233 (15.0)            |            |
| <b>Geographic region</b>                               | Midwest      | 88,084 (19.8)        | 132,347 (20.6)           | 0.0231     |
|                                                        | Northeast    | 133,004 (29.8)       | 190,573 (29.7)           |            |
|                                                        | South        | 130,925 (29.4)       | 184,547 (28.8)           |            |
|                                                        | West         | 67,466 (15.1)        | 95,983 (15.0)            |            |
|                                                        | Unknown      | 26,514 (5.9)         | 37,745 (5.9)             |            |
| <b>Month of index date</b>                             | 08-2022      | 4 (<0.1)             | 5 (<0.1)                 | 0.0217     |
|                                                        | 09-2022      | 121,214 (27.2)       | 180,378 (28.1)           |            |
|                                                        | 10-2022      | 170,795 (38.3)       | 243,450 (38)             |            |
|                                                        | 11-2022      | 85,888 (19.3)        | 120,926 (18.9)           |            |
|                                                        | 12-2022      | 46,044 (10.3)        | 65,199 (10.2)            |            |
|                                                        | 1-2023       | 17,650 (4.0)         | 25,039 (3.9)             |            |
|                                                        | 2-2023       | 4,399 (1.0)          | 6,198 (1.0)              |            |
| <b>Primary series COVID-19 vaccine</b>                 | Heterologous | 23,370 (5.2)         | 43,556 (6.8)             | 0.0764     |
|                                                        | Homologous   | 88,844 (19.9)        | 115,802 (18.1)           |            |
|                                                        | Not reported | 333,781 (74.8)       | 481,837 (75.1)           |            |
| <b>Time since last COVID-19 monovalent vaccination</b> | ≤90 days     | 6,827 (1.5)          | 9,565 (1.5)              | 0.0418     |
|                                                        | 91–180 days  | 102,382 (23.0)       | 136,674 (21.3)           |            |
|                                                        | >180 days    | 203,504 (45.6)       | 302,506 (47.2)           |            |
|                                                        | Not reported | 133,281 (29.9)       | 192,450 (30.0)           |            |
| <b>Time since last COVID-19 infection</b>              | ≤120 days    | 15,150 (3.4)         | 22,238 (3.5)             | 0.0103     |
|                                                        | 121–180 days | 7,257 (1.6)          | 10,493 (1.6)             |            |
|                                                        | >180 days    | 28,855 (6.5)         | 42,960 (6.7)             |            |
|                                                        | Not reported | 394,732 (88.5)       | 565,504 (88.2)           |            |
| <b>Underlying medical conditions</b>                   | Asthma       | 36,304 (8.1)         | 52,433 (8.2)             | 0.0014     |
|                                                        | Cancer       | 173,386 (38.9)       | 248,505 (38.8)           | 0.0025     |

|  |                                                   |                |                |        |
|--|---------------------------------------------------|----------------|----------------|--------|
|  | Cerebrovascular disease                           | 44,071 (9.9)   | 64,071 (10.0)  | 0.0037 |
|  | Chronic lung disease                              | 59,176 (13.3)  | 86,016 (13.4)  | 0.0043 |
|  | Chronic liver disease                             | 5,852 (1.3)    | 8,542 (1.3)    | 0.0018 |
|  | CKD                                               | 71,141 (16)    | 103,363 (16.1) | 0.0046 |
|  | Cystic fibrosis                                   | 48 (<0.1)      | 67 (<0.1)      | 0.0003 |
|  | Diabetes type 1 or 2                              | 125,880 (28.2) | 181,558 (28.3) | 0.0020 |
|  | Disability                                        | 19,111 (4.3)   | 27,624 (4.3)   | 0.0011 |
|  | Heart conditions                                  | 107,398 (24.1) | 155,468 (24.2) | 0.0039 |
|  | HIV                                               | 1,217 (0.3)    | 1,766 (0.3)    | 0.0005 |
|  | Mental health disorders                           | 64,813 (14.5)  | 95,743 (14.9)  | 0.0113 |
|  | Neurological conditions                           | 21,113 (4.7)   | 32,188 (5)     | 0.0133 |
|  | Obesity                                           | 92,563 (20.8)  | 133,914 (20.9) | 0.0032 |
|  | Primary immunodeficiencies                        | 33,885 (7.6)   | 48,689 (7.6)   | 0.0002 |
|  | Physical inactivity                               | 498 (0.1)      | 734 (0.1)      | 0.0009 |
|  | Smoking <sup>a</sup>                              | 68,883 (15.4)  | 100,317 (15.6) | 0.0055 |
|  | Solid organ or hematopoietic stem cell transplant | 5,561 (1.2)    | 8,054 (1.3)    | 0.0008 |
|  | Tuberculosis                                      | 167 (<0.1)     | 237 (<0.1)     | 0.0003 |
|  | Use of immunosuppressants                         | 27,115 (6.1)   | 38,984 (6.1)   | 0.0000 |

Data are presented as n (%) unless otherwise stated. CKD, chronic kidney disease; SD, standard deviation; SMD, standardized mean difference. <sup>a</sup>Includes current and former smokers.

**Table S6. Baseline characteristics (post-weighting) of individuals hospitalized for COVID-19 vaccinated with the mRNA-1273.222 or BNT162b2 Bivalent vaccine.**

|                                                        |                         | <b>mRNA-1273.222</b> | <b>BNT162b2 Bivalent</b> | <b>SMD</b> |
|--------------------------------------------------------|-------------------------|----------------------|--------------------------|------------|
| <b>Number of patients</b>                              |                         | 1,032                | 1,855                    |            |
| <b>Age at index, mean (SD)</b>                         |                         | 71 (14.0)            | 72 (14.2)                | 0.0837     |
| <b>Sex</b>                                             | Female                  | 524 (50.8)           | 960 (51.8)               | 0.0192     |
|                                                        | Male                    | 508 (49.2)           | 895 (48.2)               |            |
| <b>Race</b>                                            | Black                   | 51 (5.0)             | 84 (4.5)                 | 0.1134     |
|                                                        | Other                   | 33 (3.2)             | 42 (2.3)                 |            |
|                                                        | White                   | 426 (41.3)           | 693 (37.4)               |            |
|                                                        | Unknown                 | 522 (50.5)           | 1036 (55.9)              |            |
| <b>Ethnicity</b>                                       | Hispanic                | 42 (4.1)             | 60 (3.2)                 | 0.0452     |
|                                                        | Non-Hispanic            | 872 (84.5)           | 1586 (85.5)              |            |
|                                                        | Unknown                 | 119 (11.5)           | 210 (11.3)               |            |
| <b>Geographic region</b>                               | Midwest                 | 207 (20.1)           | 418 (22.5)               | 0.089      |
|                                                        | Northeast               | 327 (31.7)           | 589 (31.8)               |            |
|                                                        | South                   | 276 (26.8)           | 435 (23.5)               |            |
|                                                        | West                    | 139 (13.5)           | 251 (13.5)               |            |
|                                                        | Unknown                 | 83 (8.0)             | 162 (8.7)                |            |
| <b>Month of index date</b>                             | 08-2022                 | 0 (0.0)              | 0 (0.0)                  | 0.0965     |
|                                                        | 09-2022                 | 334 (32.4)           | 665 (35.9)               |            |
|                                                        | 10-2022                 | 452 (43.8)           | 788 (42.5)               |            |
|                                                        | 11-2022                 | 190 (18.4)           | 290 (15.7)               |            |
|                                                        | 12-2022                 | 47 (4.6)             | 97 (5.2)                 |            |
|                                                        | 1-2023                  | 9 (0.8)              | 14 (0.8)                 |            |
|                                                        | 2-2023                  | 0 (0.0)              | 0 (0.0)                  |            |
| <b>Primary series COVID-19 vaccine</b>                 | Heterologous            | 75 (7.3)             | 172 (9.3)                | 0.0719     |
|                                                        | Homologous              | 201 (19.4)           | 354 (19.1)               |            |
|                                                        | Not reported            | 756 (73.3)           | 1329 (71.7)              |            |
| <b>Time since last COVID-19 monovalent vaccination</b> | ≤90 days                | 19 (1.8)             | 45 (2.4)                 | 0.0571     |
|                                                        | 91–180 days             | 224 (21.7)           | 401 (21.6)               |            |
|                                                        | >180 days               | 506 (49.0)           | 872 (47.0)               |            |
|                                                        | Not reported            | 283 (27.4)           | 537 (29.0)               |            |
| <b>Time since last COVID-19 infection</b>              | ≤120 days               | 105 (10.2)           | 219 (11.8)               | 0.0643     |
|                                                        | 121–180 days            | 20 (1.9)             | 29 (1.6)                 |            |
|                                                        | >180 days               | 100 (9.7)            | 193 (10.4)               |            |
|                                                        | Not reported            | 807 (78.2)           | 1414 (76.2)              |            |
| <b>Underlying medical conditions</b>                   | Asthma                  | 173 (16.8)           | 277 (14.9)               | 0.0497     |
|                                                        | Cancer                  | 437 (42.3)           | 828 (44.6)               | 0.0457     |
|                                                        | Cerebrovascular disease | 204 (19.8)           | 390 (21.0)               | 0.0309     |
|                                                        | Chronic lung disease    | 326 (31.5)           | 655 (35.3)               | 0.0796     |

|  |                                                   |            |            |        |
|--|---------------------------------------------------|------------|------------|--------|
|  | Chronic liver disease                             | 39 (3.8)   | 74 (4.0)   | 0.0094 |
|  | CKD                                               | 343 (33.2) | 640 (34.5) | 0.0265 |
|  | Diabetes type 1 or 2                              | 417 (40.4) | 817 (44.0) | 0.0748 |
|  | Disability                                        | 106 (10.3) | 182 (9.8)  | 0.0153 |
|  | Heart conditions                                  | 481 (46.6) | 909 (49.0) | 0.0477 |
|  | HIV                                               | 9 (0.9)    | 12 (0.6)   | 0.0242 |
|  | Mental health disorders                           | 287 (27.8) | 554 (29.8) | 0.0445 |
|  | Neurological conditions                           | 137 (13.2) | 274 (14.8) | 0.0448 |
|  | Obesity                                           | 304 (29.5) | 571 (30.8) | 0.0278 |
|  | Primary immunodeficiencies                        | 155 (15.1) | 279 (15.0) | 0.0002 |
|  | Pregnancy <sup>a</sup>                            | 30 (2.9)   | 38 (2.1)   | 0.0559 |
|  | Physical inactivity                               | 4 (0.4)    | 2 (<0.1)   | 0.0611 |
|  | Smoking <sup>b</sup>                              | 303 (29.4) | 568 (30.6) | 0.0263 |
|  | Solid organ or hematopoietic stem cell transplant | 67 (6.5)   | 139 (7.5)  | 0.0380 |
|  | Tuberculosis                                      | 1 (0.1)    | 4 (0.2)    | 0.0147 |
|  | Use of immunosuppressants                         | 118 (11.4) | 200 (10.8) | 0.0191 |

Data are presented as n (%) unless otherwise stated. <sup>a</sup>Includes recent pregnancy. <sup>b</sup>Includes current and former smokers. CKD, chronic kidney disease; SD, standard deviation; SMD, standardized mean difference.

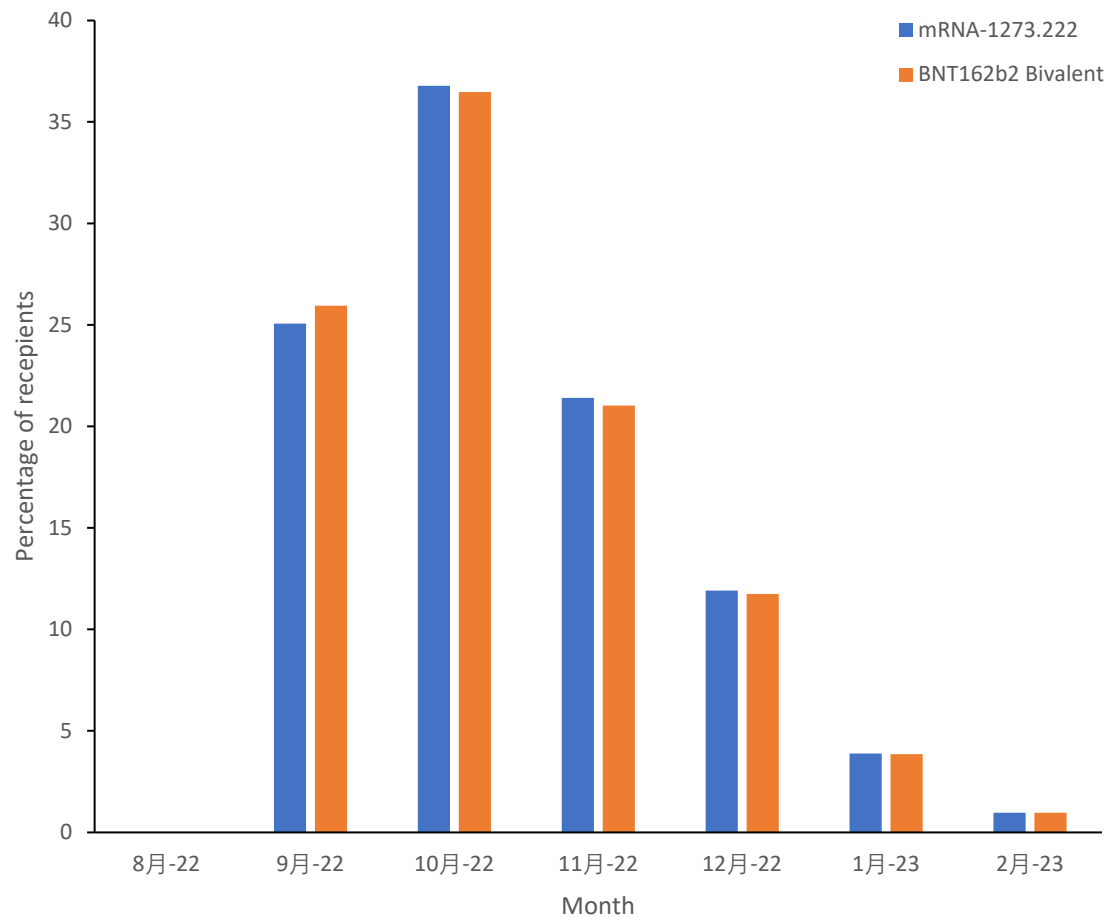

**Figure S1. Percentage of individuals included in the weighted analysis by month of vaccination.**

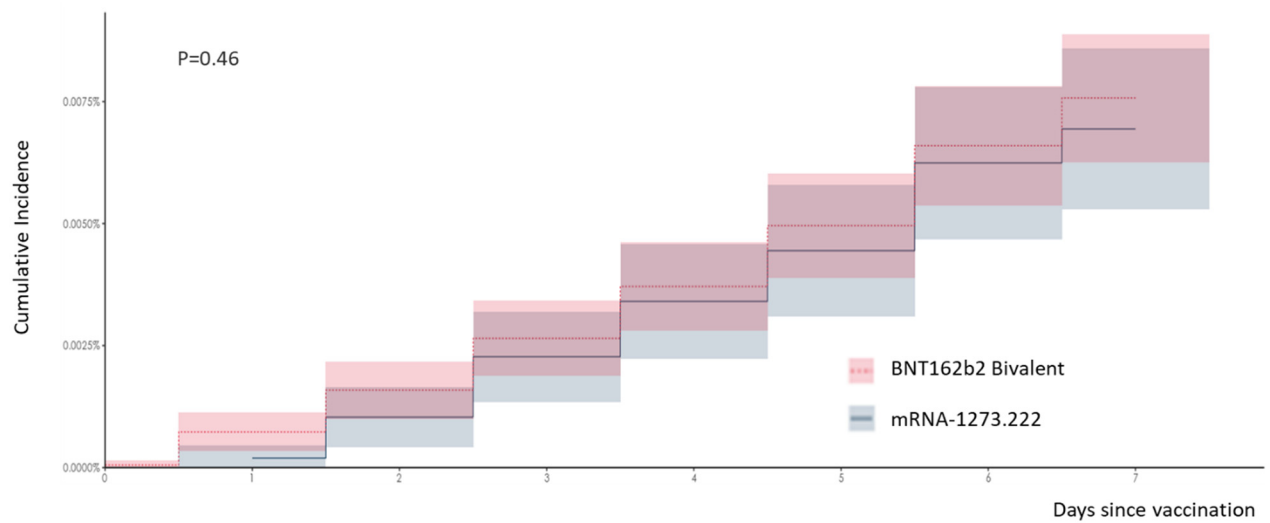

**Figure S2. Negative control Kaplan–Meier curves for COVID-19–related hospitalization rates 7 days prior to CED in recipients of the mRNA-1273.222 or BNT162b2 Bivalent vaccine.** The dashed pink line represents the risk curve for BNT162b2 Bivalent. The solid blue line represents the risk curve for mRNA-1273.222. Shaded areas represent 95% confidence intervals.

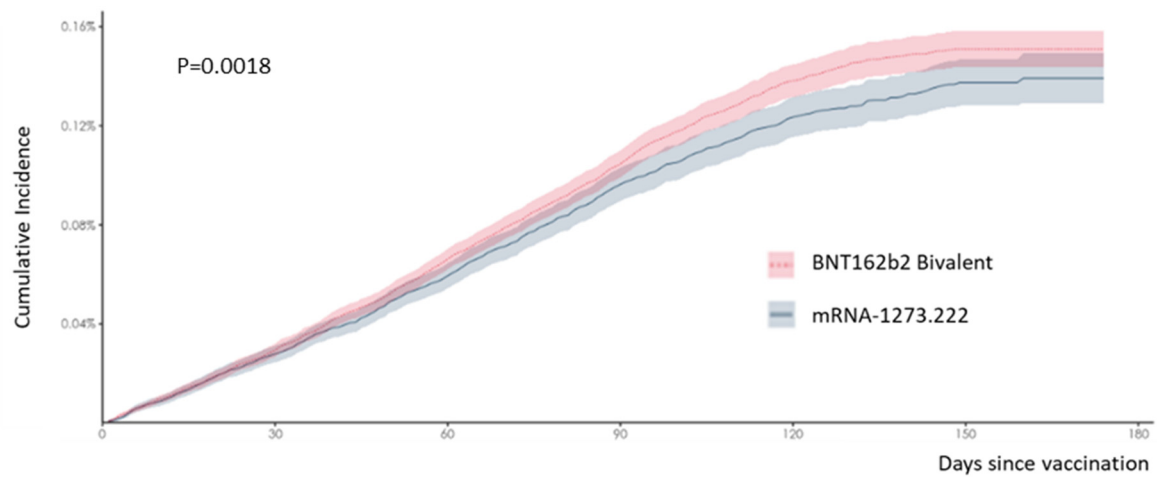

#### Number at risk

|                        | 0d        | 30d       | 60d       | 90d       | 120d    | 150d    |
|------------------------|-----------|-----------|-----------|-----------|---------|---------|
| mRNA-1273.222 bivalent | 1,034,538 | 967,332   | 850,932   | 662,711   | 414,249 | 140,204 |
| BNT162b2 bivalent      | 1,670,666 | 1,565,594 | 1,380,493 | 1,075,062 | 683,810 | 233,213 |

#### Cumulative number of events

|                        | 0d | 30d | 60d   | 90d   | 120d  | 150d  |
|------------------------|----|-----|-------|-------|-------|-------|
| mRNA-1273.222 bivalent | 0  | 280 | 568   | 845   | 993   | 1,031 |
| BNT162b2 bivalent      | 0  | 475 | 1,019 | 1,487 | 1,790 | 1,855 |

**Figure S3. Kaplan–Meier curves of COVID-19–related hospitalizations over time in recipients of the mRNA-1273.222 or BNT162b2 Bivalent vaccine.**



## Supplementary References

1. Nguyen VH, Boileau C, Bogdanov A, et al. Relative effectiveness of BNT162b2, mRNA-1273, and Ad26.COV2.S vaccines and homologous boosting in preventing COVID-19 in adults in the US. *Open Forum Infectious Diseases* 2023;ofad288.
2. Boikos C, McGovern I, Ortiz JR, Puig-Barberà J, Versage E, Haag M. Relative Vaccine Effectiveness of Adjuvanted Trivalent Influenza Vaccine over Three Consecutive Influenza Seasons in the United States. *Vaccines (Basel)* 2022;10.
3. Imran M, Ortiz JR, McLean HQ, et al. Relative Effectiveness of Cell-based Versus Egg-based Quadrivalent Influenza Vaccines in Children and Adolescents in the United States During the 2019-2020 Influenza Season. *Pediatr Infect Dis J* 2022;41:769-74.
4. Holm S. A Simple Sequentially Rejective Multiple Test Procedure. *Scandinavian Journal of Statistics* 1979;6:65-70.
